# Supplementary material for: Aided Phytoremediation to Clean Up Dioxins/Furans-Aged Contaminated Soil: Correlation between Microbial Communities and Pollutant Dissipation
Source: Microorganisms. 2019 Nov 3;7(11):523. doi: 10.3390/microorganisms7110523 (PMC6920798; doi:10.3390/microorganisms7110523)
Supplement: Supplementary file 1 [file microorganisms-07-00523-s001.pdf]

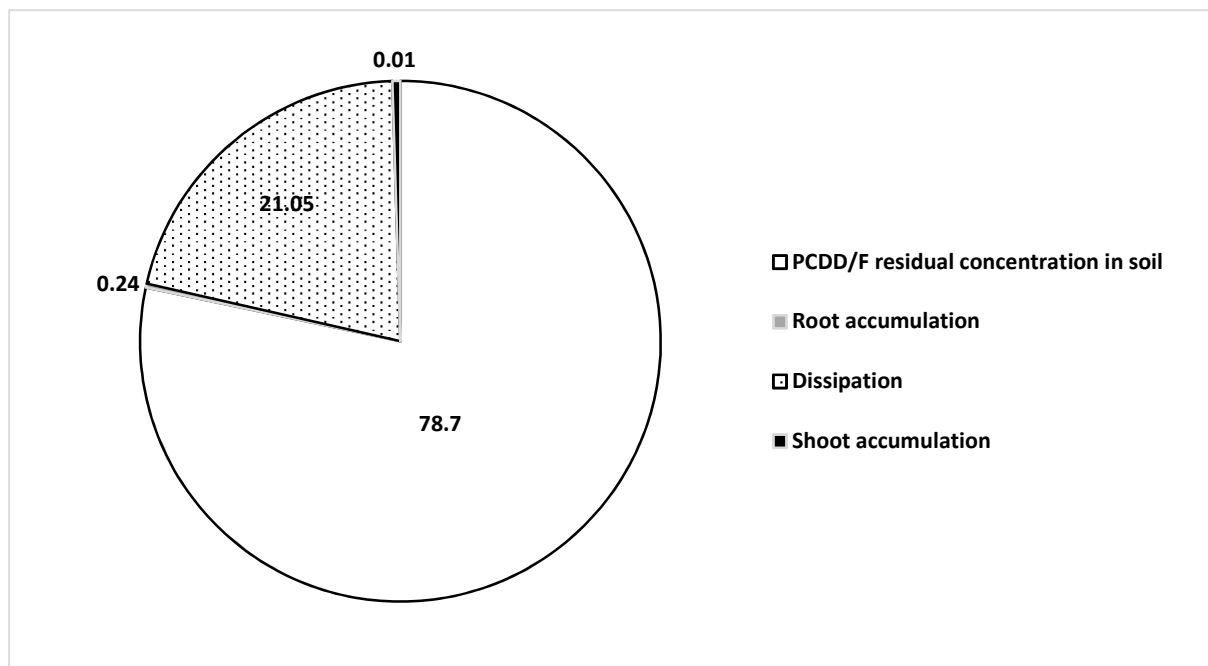

**Figure S1.** Repartition (%) of PCDD/F in the A+Fm+RW1+Rh+μb condition after six months of culture in microcosms.

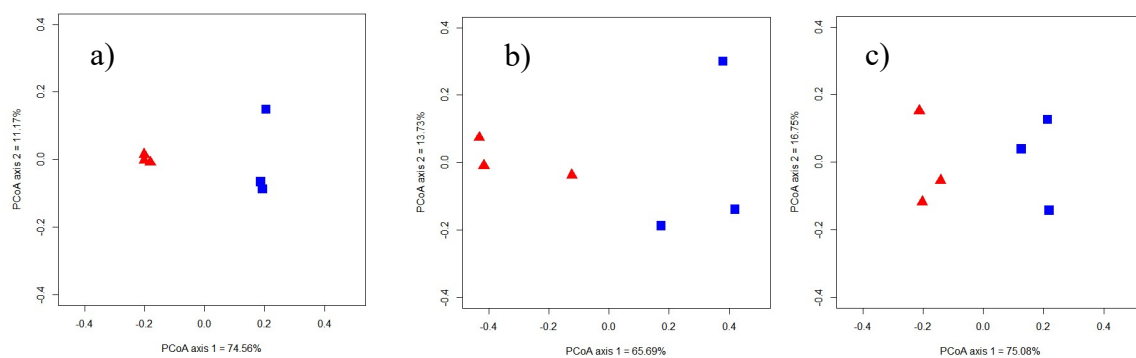

**Figure S2.** Principal coordinates analysis (PCoA) of (a) Bacteria, (b) Fungi and (c) Total Archaeal community. Red color for the control non-vegetated soil, blue color for A+Fm+RW1+Rh+μb condition

**Table S1.** Summary of sequencing bioinformatics identification of OTU.

|                          | Bacteria | Fungi  | Archaea |
|--------------------------|----------|--------|---------|
| No sequences (sum)       | 91,236   | 43,194 | 223,218 |
| No seq. (mean)           | 15,206   | 7,199  | 37,203  |
| No seq. filtered         | 5,505    | 2,354  | 12,254  |
| No seq. chimeras (mean)  | 991      | 725    | 1,023   |
| No seq. singleton (mean) | 2,664    | 1,883  | 13,770  |
| No samples               | 6        | 6      | 6       |
| No seq. saved (mean)     | 6,046    | 2,962  | 13,216  |
| OTUs (sum)               | 1,205    | 3,296  | 11      |

**Table S2:** Description of the performed tests

| Methods kind    | Name                                                                                                                                                                                                        | Descriptions                                                                                                                                                        |
|-----------------|-------------------------------------------------------------------------------------------------------------------------------------------------------------------------------------------------------------|---------------------------------------------------------------------------------------------------------------------------------------------------------------------|
| Physicochemical | <ul style="list-style-type: none"> <li>- AMF root colonization</li> <li>- Root and shoot dry weights</li> <li>- Pigment contents</li> <li>- Dioxins/furans content</li> <li>- DNA quantification</li> </ul> | <ul style="list-style-type: none"> <li>- Microscopic</li> <li>- Balance</li> <li>- Spectrophotometer</li> <li>- GC/HRMS</li> <li>-</li> </ul>                       |
| Biochemical     | <ul style="list-style-type: none"> <li>- Soil enzyme assays (Dehydrogenase and Fluorescein diacetate hydrolase)</li> <li>- DNA extraction</li> </ul>                                                        | <ul style="list-style-type: none"> <li>- Spectrophotometer and spectrofluorometer</li> <li>- Macherey-Nagel kit</li> </ul>                                          |
| Biological      | <ul style="list-style-type: none"> <li>- Cytotoxicity tests</li> <li>- PCR and amplicon sequencing</li> </ul>                                                                                               | <ul style="list-style-type: none"> <li>- Cytotoxicity Detection Kit lactate dehydrogenase and Cell Proliferation Reagent WST-1</li> <li>- Illumina MiSeq</li> </ul> |
| Bioinformatic   | <ul style="list-style-type: none"> <li>- QIIME</li> <li>- Mothur</li> </ul>                                                                                                                                 | <ul style="list-style-type: none"> <li>- Brazilian Microbiome Project</li> </ul>                                                                                    |
| Statistical     | <ul style="list-style-type: none"> <li>- Shapiro and Bartlett tests</li> <li>- ANOVA one-way,</li> <li>- Mann-Whitney</li> <li>- Kruskal-Wallis tests</li> </ul>                                            |                                                                                                                                                                     |
